# Supplementary material
Source: PubMed Central journal article supplement (PMC10873025)
Supplement: NIHMS1931088-supplement-Supplementary_Material.pdf [file NIHMS1931088-supplement-Supplementary_Material.pdf]

**The following content was supplied by the authors as supporting material and has not been copy-edited or verified by JBJS.**

**Supplementary Table 1: Additional patient characteristics by outcome**

|                                                            |                                                             | All      | Duration of Symptoms |                    | p       |
|------------------------------------------------------------|-------------------------------------------------------------|----------|----------------------|--------------------|---------|
|                                                            |                                                             | n (%)    | <12 weeks<br>n (%)   | 12+ weeks<br>n (%) |         |
| <i>N</i>                                                   |                                                             | 351      | 222                  | 129                |         |
| <b>Age at Symptom Presentation</b>                         |                                                             |          |                      |                    | 0.013   |
|                                                            | < 11                                                        | 95 (27)  | 47 (21)              | 48 (37)            |         |
|                                                            | 11                                                          | 85 (24)  | 57 (26)              | 28 (22)            |         |
|                                                            | 12                                                          | 79 (23)  | 55 (25)              | 24 (19)            |         |
|                                                            | ≥ 13                                                        | 92 (26)  | 63 (28)              | 29 (22)            |         |
| <b>Sex</b>                                                 |                                                             |          |                      |                    | 0.64    |
|                                                            | Female                                                      | 139 (40) | 90 (41)              | 49 (38)            |         |
|                                                            | Male                                                        | 212 (60) | 132 (59)             | 80 (62)            |         |
| <b>Race/Ethnicity</b>                                      |                                                             |          |                      |                    | 0.24    |
|                                                            | White                                                       | 187 (61) | 125 (65)             | 62 (53)            |         |
|                                                            | Black                                                       | 75 (24)  | 44 (23)              | 31 (27)            |         |
|                                                            | Hispanic**                                                  | 31 (10)  | 15 (8)               | 16 (14)            |         |
|                                                            | Asian                                                       | 8 (3)    | 4 (2)                | 4 (3)              |         |
|                                                            | Other                                                       | 6 (2)    | 3 (2)                | 3 (3)              |         |
|                                                            | Missing/Not Recorded /Declined                              | 44       | 31                   | 13                 |         |
| <b>BMI category</b>                                        |                                                             |          |                      |                    | 0.028   |
|                                                            | Underweight /Normal (< 85 <sup>th</sup> percentile)         | 57 (17)  | 42 (20)              | 15 (12)            |         |
|                                                            | Overweight (86 <sup>th</sup> - 95 <sup>th</sup> percentile) | 65 (19)  | 48 (22)              | 17 (14)            |         |
|                                                            | Obese (> 95 <sup>th</sup> percentile)                       | 217 (64) | 125 (58)             | 92 (74)            |         |
|                                                            | Missing                                                     | 12       | 7                    | 5                  |         |
| <b>Slip Severity Classification</b>                        |                                                             |          |                      |                    | <0.0001 |
|                                                            | Mild                                                        | 197 (62) | 150 (75)             | 47 (41)            |         |
|                                                            | Moderate                                                    | 81 (26)  | 47 (23)              | 34 (30)            |         |
|                                                            | Severe                                                      | 38 (12)  | 4 (2)                | 34 (30)            |         |
|                                                            | Missing/Not Recorded                                        | 35       | 21                   | 14                 |         |
| <b>Physician Specialty at Time of Presentation to Care</b> |                                                             |          |                      |                    | 0.10    |
|                                                            | Internal Medicine/Family Practitioner                       | 7 (2)    | 2 (1)                | 5 (4)              |         |
|                                                            | Pediatrician                                                | 200 (58) | 127 (58)             | 73 (59)            |         |
|                                                            | Emergency Department Physician                              | 72 (21)  | 51 (23)              | 21 (17)            |         |
|                                                            | Orthopedic Surgeon                                          | 59 (17)  | 34 (16)              | 25 (20)            |         |
|                                                            | Sports Medicine Physician                                   | 4 (1)    | 4 (2)                | 0                  |         |
|                                                            | Other                                                       | 1 (0)    | 1 (0)                | 0                  |         |
|                                                            | Missing/ Not Recorded                                       | 8        | 3                    | 5                  |         |
| <b>Physician Specialty at Time of Diagnosis</b>            |                                                             |          |                      |                    | 0.01    |
|                                                            | Internal Medicine/Family Practitioner                       | 3 (1)    | 1 (0)                | 2 (2)              |         |
|                                                            | Pediatrician                                                | 105 (30) | 73 (33)              | 32 (25)            |         |
|                                                            | Emergency Department Physician                              | 73 (21)  | 55 (25)              | 18 (14)            |         |
|                                                            | Orthopedic Surgeon                                          | 157 (45) | 83 (38)              | 74 (57)            |         |

|                                                                                                             | All      | Duration of Symptoms |                    | p       |
|-------------------------------------------------------------------------------------------------------------|----------|----------------------|--------------------|---------|
|                                                                                                             | n (%)    | <12 weeks<br>n (%)   | 12+ weeks<br>n (%) |         |
| <i>Sports Medicine Physician</i>                                                                            | 7 (2)    | 5 (2)                | 2 (2)              |         |
| <i>Other</i>                                                                                                | 4 (1)    | 3 (1)                | 1 (1)              |         |
| <i>Missing/Not Recorded</i>                                                                                 | 2        | 2                    | 0                  |         |
| <b><i>Number of Interactions with Healthcare—Symptom onset to Diagnosis (diagnostic visit included)</i></b> |          |                      |                    | <0.0001 |
| <i>1</i>                                                                                                    | 177 (52) | 137 (63)             | 40 (33)            |         |
| <i>2</i>                                                                                                    | 124 (36) | 70 (32)              | 54 (44)            |         |
| <i>≥ 3</i>                                                                                                  | 40 (12)  | 12 (5)               | 28 (23)            |         |
| <i>Missing</i>                                                                                              | 10       | 3                    | 7                  |         |

\* Based on US percentiles

\*\* Hispanic ethnicity was not reported independently from race in the medical record during the timeframe of this study

**Supplementary Table 2. Sensitivity analysis - Logistic regression models adding race/ethnicity**

|                                                              | Primary Predictor |         |                   |         |                  |         |                      |         |
|--------------------------------------------------------------|-------------------|---------|-------------------|---------|------------------|---------|----------------------|---------|
|                                                              | Insurance Status* |         | Family Structure† |         | SVI‡ (U.S.)      |         | SVI‡ (Massachusetts) |         |
|                                                              | Adjusted OR§      | P Value | Adjusted OR§      | P Value | Adjusted OR§     | P Value | Adjusted OR§         | P Value |
| Primary predictor                                            | 1.66 (1.00-2.76)  | 0.048   | 1.87 (1.03-3.39)  | 0.039   | 1.13 (0.59-2.17) | 0.72    | 1.13 (0.58-2.19)     | 0.72    |
| Race or ethnicity                                            |                   |         |                   |         |                  |         |                      |         |
| White                                                        | Reference         |         | Reference         |         | Reference        |         | Reference            |         |
| Black                                                        | 1.27 (0.68-2.38)  | 0.46    | 1.18 (0.62-2.25)  | 0.62    | 1.36 (0.71-2.62) | 0.36    | 1.45 (0.75-2.81)     | 0.27    |
| Hispanic‡                                                    | 1.96 (0.85-4.54)  | 0.12    | 2.07 (0.90-4.73)  | 0.09    | 2.21 (0.93-5.24) | 0.07    | 2.32 (0.98-5.50)     | 0.06    |
| Asian/Other                                                  | 2.43 (0.75-7.90)  | 0.14    | 2.53 (0.79-8.10)  | 0.12    | 2.39 (0.74-7.74) | 0.15    | 2.49 (0.77-8.05)     | 0.13    |
| Age at symptom presentation                                  |                   |         |                   |         |                  |         |                      |         |
| <11 years                                                    | Reference         |         | Reference         |         | Reference        |         | Reference            |         |
| 11 years                                                     | 0.50 (0.26-0.97)  | 0.041   | 0.44 (0.23-0.87)  | 0.018   | 0.48 (0.25-0.92) | 0.027   | 0.48 (0.25-0.92)     | 0.028   |
| 12 years                                                     | 0.35 (0.17-0.73)  | 0.005   | 0.34 (0.16-0.70)  | 0.003   | 0.34 (0.17-0.70) | 0.004   | 0.34 (0.16-0.69)     | 0.003   |
| ≥13 years                                                    | 0.45 (0.21-0.94)  | 0.034   | 0.41 (0.19-0.86)  | 0.019   | 0.44 (0.21-0.92) | 0.029   | 0.45 (0.21-0.94)     | 0.033   |
| Sex                                                          |                   |         |                   |         |                  |         |                      |         |
| Female                                                       | Reference         |         | Reference         |         | Reference        |         | Reference            |         |
| Male                                                         | 1.46 (0.83-2.56)  | 0.18    | 1.47 (0.84-2.57)  | 0.18    | 1.43 (0.82-2.50) | 0.21    | 1.45 (0.83-2.54)     | 0.2     |
| Weight Status                                                |                   |         |                   |         |                  |         |                      |         |
| Underweight or Normal (< 85 <sup>th</sup> percentile)        | Reference         |         | Reference         |         | Reference        |         | Reference            |         |
| Overweight (85 <sup>th</sup> to 94 <sup>th</sup> percentile) | 0.85 (0.36-2.00)  | 0.72    | 0.89 (0.38-2.09)  | 0.79    | 0.85 (0.36-2.00) | 0.71    | 0.85 (0.36-2.00)     | 0.71    |
| Obese (≥95 <sup>th</sup> percentile)                         | 1.43 (0.70-2.94)  | 0.33    | 1.43 (0.70-2.95)  | 0.33    | 1.44 (0.70-2.94) | 0.32    | 1.40 (0.68-2.88)     | 0.36    |
| Calendar year of symptom presentation                        |                   |         |                   |         |                  |         |                      |         |
| 2002-2009                                                    | 1.63 (0.85-3.13)  | 0.14    | 1.48 (0.77-2.83)  | 0.24    | 1.44 (0.76-2.73) | 0.26    | 1.42 (0.75-2.68)     | 0.28    |
| 2010-2015                                                    | 1.52 (0.82-2.84)  | 0.18    | 1.43 (0.77-2.65)  | 0.25    | 1.44 (0.78-2.65) | 0.25    | 1.40 (0.75-2.58)     | 0.29    |
| 2016-2021                                                    | Reference         |         | Reference         |         | Reference        |         | Reference            |         |
| No. of siblings (excluding patient)                          |                   |         |                   |         |                  |         |                      |         |
| 0                                                            | Reference         |         | Reference         |         | Reference        |         | Reference            |         |
| 1                                                            | 0.94 (0.39-2.26)  | 0.90    | 1.12 (0.46-2.72)  | 0.81    | 0.94 (0.40-2.23) | 0.89    | 0.93 (0.39-2.22)     | 0.87    |
| ≥2                                                           | 1.07 (0.44-2.58)  | 0.89    | 1.31 (0.53-3.22)  | 0.55    | 1.13 (0.47-2.70) | 0.79    | 1.14 (0.48-2.74)     | 0.76    |
| Physician specialty at time of symptom presentation          |                   |         |                   |         |                  |         |                      |         |
| Internal Medicine or Family Medicine or Pediatrician         | Reference         |         | Reference         |         | Reference        |         | Reference            |         |
| Emergency Department                                         | 0.63 (0.33-1.17)  | 0.14    | 0.64 (0.34-1.20)  | 0.16    | 0.67 (0.36-1.25) | 0.21    | 0.67 (0.36-1.25)     | 0.21    |
| Orthopaedic Surgeon                                          | 1.27 (0.67-2.42)  | 0.46    | 1.23 (0.65-2.33)  | 0.52    | 1.21 (0.64-2.29) | 0.56    | 1.21 (0.64-2.28)     | 0.56    |

\*Reference: private insurance. †Reference: multiguardian households. ‡Reference: <75<sup>th</sup> percentile. §The values are given as the adjusted OR, with the 95% CI in parentheses
